# Supplementary material for: Fructose Consumption Affects Placental Production of H2S: Impact on Preeclampsia-Related Parameters
Source: MDPI journal article supplement (doi:10.3390/nu16020309), 2024-01-20
Supplement: s1 [file s1]

**Table S1.** Placental gene expression in pregnant rats subjected to fructose or glucose intake throughout pregnancy and control mothers.

|                    | <b>CONTROL</b> | <b>FRUCTOSE</b> | <b>GLUCOSE</b> |
|--------------------|----------------|-----------------|----------------|
| <b>CSE (a.u.)</b>  | 0.069 ± 0.011  | 0.097 ± 0.013   | 0.099 ± 0.023  |
| <b>CBS (a.u.)</b>  | 0.008 ± 0.001  | 0.023 ± 0.008   | 0.005 ± 0.000  |
| <b>3MST (a.u.)</b> | 0.715 ± 0.033  | 0.793 ± 0.092   | 0.672 ± 0.046  |

Data are expressed as means ± S.E., n= 7 (control); 7 (fructose); and 6 (glucose) rats. Relative target gene mRNA levels were measured by real-time PCR as explained in Materials and Methods, normalized to Rps29 levels and expressed in arbitrary units (a.u.). CSE: Cystathionine-γ-lyase; CBS: Cystathionine-β-synthase; 3MST: 3-Mercaptopyruvate Sulfotransferase.

**Table S2.** Placental gene expression in pregnant rats from fructose-fed mothers subjected (FF) or not (FC) to fructose intake throughout pregnancy and control mothers.

|                        | <b>CC</b>     | <b>FC</b>      | <b>FF</b>      |
|------------------------|---------------|----------------|----------------|
| <b>CSE (a.u.)</b>      | 0.068 ± 0.004 | 0.077 ± 0.011  | 0.062 ± 0.004  |
| <b>CBS (a.u.)</b>      | 0.005 ± 0.001 | 0.004 ± 0.0004 | 0.004 ± 0.0007 |
| <b>3MST (a.u.)</b>     | 0.96 ± 0.026  | 1.02 ± 0.06    | 1.11 ± 0.07    |
| <b>ACO1 (a.u.)</b>     | 0.98 ± 0.013  | 1.20 ± 0.24    | 1.04 ± 0.09    |
| <b>ACO2 (a.u.)</b>     | 0.94 ± 0.022  | 1.06 ± 0.15    | 1.036 ± 0.092  |
| <b>Ferritin (a.u.)</b> | 1.019 ± 0.10  | 1.15 ± 0.204   | 1.024 ± 0.08   |
| <b>TFR1 (a.u.)</b>     | 1.027 ± 0.11  | 1.14 ± 0.33    | 0.83 ± 0.14    |
| <b>AR (a.u.)</b>       | 36.16 ± 2.39  | 29.85 ± 2.61   | 29.52 ± 1.54   |

Placental (mRNA) expression from control mothers (CC), or pregnant rats from fructose-fed mothers subjected (FF) or not (FC) to fructose intake throughout pregnancy. Data are expressed as means ± S.E., n = 5 (CC); 4 (FC); and 5 (FF) rats. Relative target gene mRNA levels were measured by real-time PCR as explained in Materials and Methods, normalized to Rps29 levels and expressed in arbitrary units (a.u.). CSE: Cystathionine-γ-lyase; CBS: Cystathionine-β-synthase; 3MST: 3-Mercaptopyruvate Sulfotransferase, ACO1: Aconitase 1; ACO2: Aconitase 2; TFR1: Transferrin Receptor 1; AR: Aldose reductase.
